# Supplementary material
Source: Springer Nature journal article supplement (https://www.springermedizin.de/resource/supplementary/12943_2010_708_MOESM9_ESM.pdf/9554628)

### a Gene expression overlapping with human TP53-mutant tumors

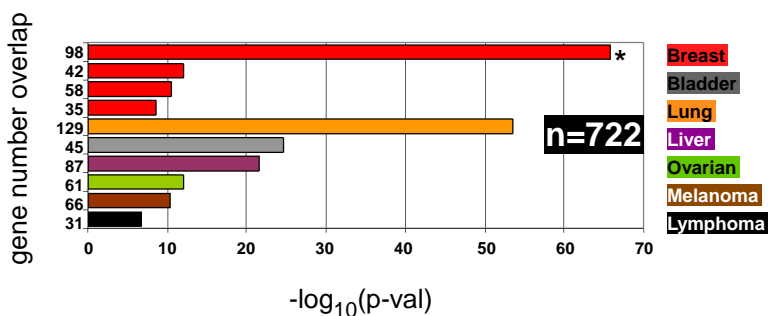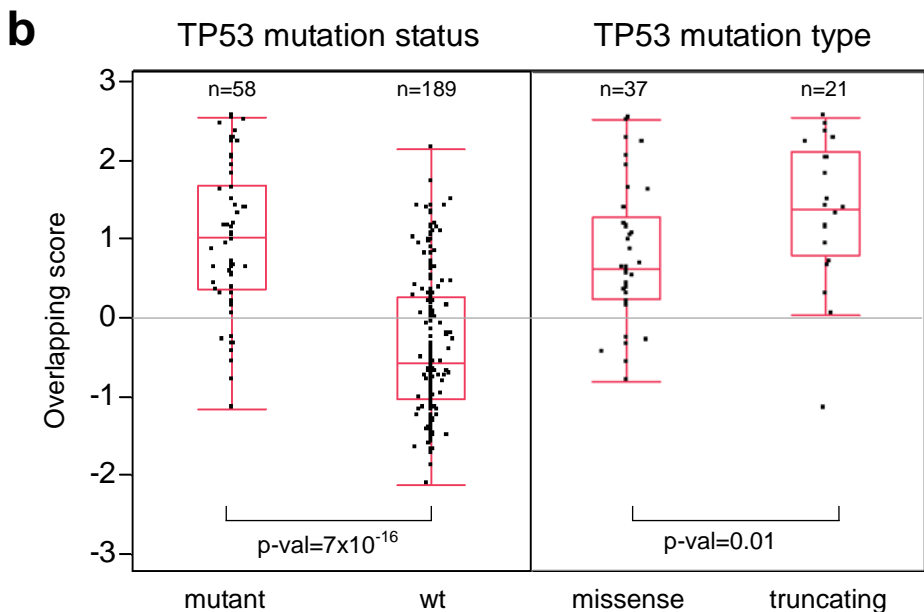

### c Gene expression overlapping with malignant human tumors

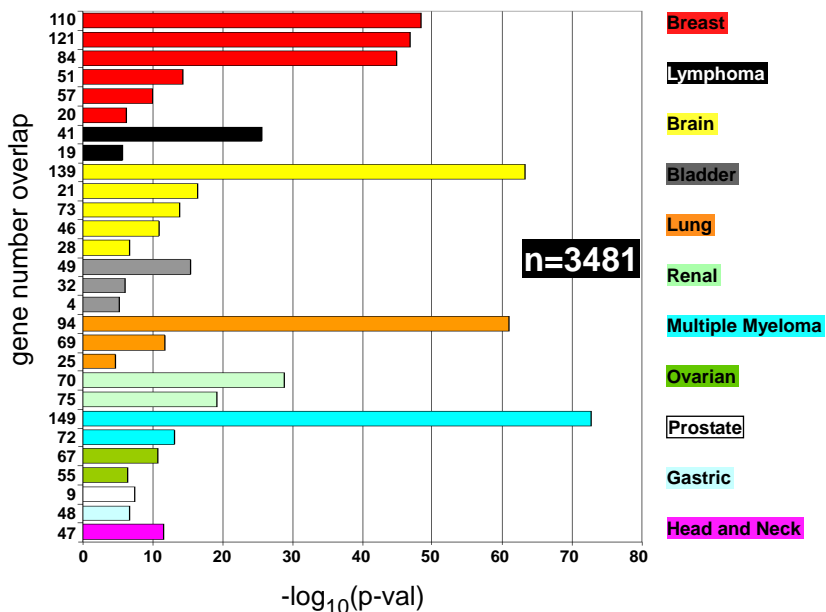

Supplement: MOESM9 [file 9554628]
